# Supplementary material for: Small herbivores and abiotic heterogeneity promote trait variation of a saltmarsh plant in local communities
Source: PeerJ journal article supplement (doi:10.7717/peerj.12633), 2021-12-22
Supplement: Supp_QC_staff_KT.pdf [file Supp_QC_staff_KT.pdf]

Online supporting text

### *Grazing pressure*

To count droppings from hares and geese, we set up a line transect adjacent to the exclosures at each successional stage in 2000 and 2016. Each line transect consisted of 20 plots (4 m<sup>2</sup>), with at least 10 m distance between each other (Note that exact position of line transects and plots therein might differ between 2000 and 2016, details in Kuijper & Bakker (2005)). We counted and removed droppings from hares and geese within plots every two or three weeks for the whole year both in 2000 (October 1999 to September 2000) and 2016 (May 2016 to April 2017). Biomass consumed is calculated as  $FM / (1 - DE)$ . FM: total dropping mass (0.85 g per goose dropping; 0.15 g per hare dropping); DE: digestive efficiency (35 % dry matter digestibility for geese; 65 % for hares). Values for dropping mass and digestive efficiency were obtained from Van der Wal et al. (1998). See Table S1 for results. Analysis of variance showed that only the successional stage had significant effects ( $F_{1,76} = 6.63$ ,  $P = 0.0119$ ), suggesting that grazing pressure at the early successional stage was higher than the intermediate successional stage in both 2000 and 2016.

### *Specific leaf area and leaf dry matter content*

Although specific leaf area and leaf dry matter content were not measured in the standard way (Pérez-Harguindeguy et al., 2016), a similar method was used in a previous study in this system (Veeneklaas et al., 2011). Note that leaf dry matter content was only measured in 3, 5, 4, and 4 plots in the grazed and ungrazed treatment at the early and intermediate successional stage, respectively. This is because we needed to bring all samples and measure the fresh weight of each leaf sample and the whole plants in the field station. We also need to do this quickly, otherwise, water will be lost in the plant tissues, which may bias estimation of fresh weight. Due to lack of manpower, we measured fresh leaf weight for around half of the randomly selected plots.

### *An example of SEM*

The sem and the specification of direct and indirect effects of small herbivores on ITV in height at the intermediate stage

```
Mod.h = '  
##direct links to height  
height~c1*cv.cl  
height~e1*cv.el  
height~gr1*genotypic.richness  
height~gd1*genotypic.diversity  
height~g1*grazing ## direct effects of herbivores  
## grazing effects on abiotic and genotypes  
cv.cl ~ c2*grazing  
cv.el ~ e2*grazing  
genotypic.richness ~ gr2*grazing  
genotypic.diversity~ gd2*grazing  
##indirect effect  
cv:=c1*c2 ## through variation in clay thickness  
ev:=e1*e2 ## through variation in elevation
```

```

47 cvev:=c1*c2+e1*e2 ## through the effects of variations in clay thickness and elevation
48 gr:=gr1*gr2 ## through genotypic richness
49 gd:=gd1*gd2 ## through genotypic diversity
50 grgd:= gr1*gr2+ gd1*gd2 ## through both genotypic richness and diversity
51 ## total effect
52 total:=g1+(c1*c2)+(e1*e2)+( gd1*gd2)+(gr1*gr2)
53
54 ## model output $ Defined Parameters:
55      Estimate Std.Err z-value P(>|z|) Std.lv Std.all
56   cv         -0.006  0.006 -0.934  0.350 -0.006 -0.102
57   ev         -0.004  0.005 -0.724  0.469 -0.004 -0.067
58  cvev        -0.010  0.008 -1.181  0.238 -0.010 -0.169
59   gr          0.001  0.003  0.430  0.667  0.001  0.026
60   gd          0.001  0.007  0.156  0.876  0.001  0.019
61  grgd         0.003  0.008  0.328  0.743  0.003  0.045
62  total        0.026  0.014  1.905  0.057  0.026  0.454
63
64

```

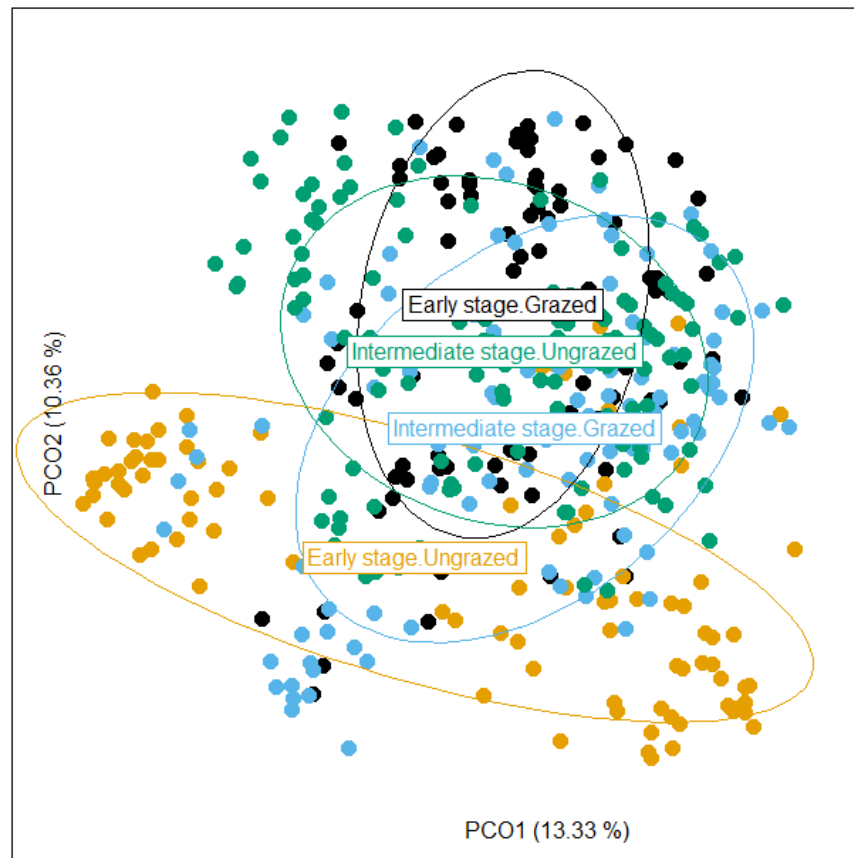

65  
66  
67 **Fig. S1. PCoA-plot of genetic distances of individuals of *Elytrigia atherica*.** The population  
68 from the ungrazed treatment substantially differentiated from that of the grazed at early  
69 successional stage. The centroids of the grazed and ungrazed at the early and intermediate

successional stage are shown. The ellipses denote 95 % bivariate confidence intervals. The percentages denote the proportion of variance explained by PCoA axes.

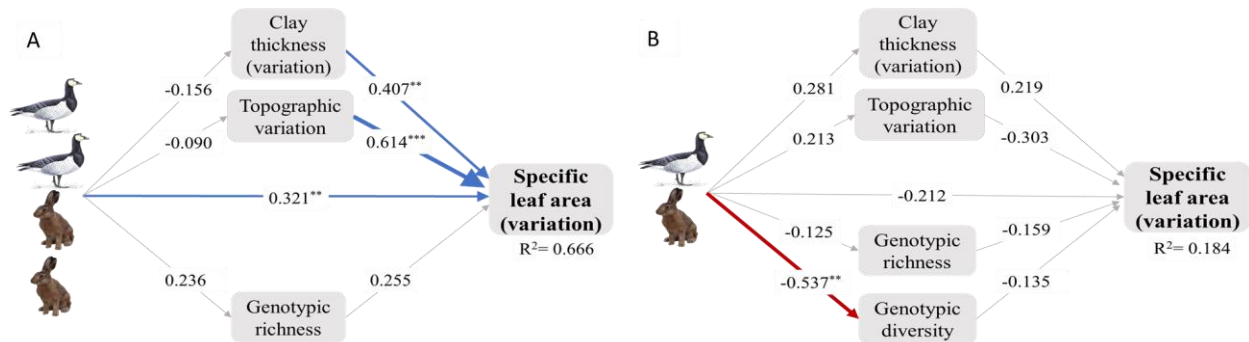

**Fig. S2. Intraspecific trait variation (ITV) of the dominant plant *Elytrigia atherica* and the direct and indirect effects of small herbivores on ITV in local communities at the early (A) and intermediate successional stage (B).** The direct effects, indirect effects through genotypes, indirect effects through abiotic variations, and total effects at the early and intermediate stages are 0.321\*\*, 0.06, -0.119, 0.262, and -0.212, 0.092, -0.003, -0.122, respectively. Model fit the data well (at the early successional stage:  $\chi^2 = 4.409$ ,  $df = 3$ ,  $N = 14$ ,  $p > 0.05$ ; at the intermediate successional stage:  $\chi^2 = 6.559$ ,  $df = 6$ ,  $N = 14$ ,  $p > 0.05$ ). Variance explained for clay thickness (variation), topographic variation, and genotypic richness for models at the early successional stage are 0.024, 0.008, and 0.056, respectively. Variance explained for clay thickness (variation), topographic variation, genotypic richness, and genotype diversity for models at the intermediate successional stage are 0.079, 0.045, 0.016, and 0.289, respectively. Number of hares and geese indicate the abundance of small herbivores such that the early successional stage had higher grazing pressure (indicated by two hares and two geese) relative to the intermediate stage (indicated by one hare and one goose). Boxes are measured variables. Arrows denote unidirectional relationships among variables. Blue arrows are significant positive relationships, red arrows are significant negative relationships, and grey arrows show non-significant relationships. The width of the arrows indicates the strength of the pathways. The values on the arrows denote standardized path coefficients. Asterisks indicate significant paths: \*  $p < 0.1$ ; \*\*  $p < 0.05$ ; \*\*\*  $p < 0.001$ .

**Table S1. Biomass consumed by hares and geese at the early and intermediate successional stage in 2000 and 2016.** Droppings were the means ( $\pm 1$  se) of the 20 4-m<sup>2</sup> plots, each with the summed whole year droppings, at each successional stage.

| Succession stage   | Year | N  | Droppings (hares/geese) | Biomass consumed  |
|--------------------|------|----|-------------------------|-------------------|
| Early stage        | 2000 | 20 | 84.25/64.95             | 30.26 $\pm$ 4.371 |
|                    | 2016 | 20 | 134.05/37.65            | 26.67 $\pm$ 5.277 |
| Intermediate stage | 2000 | 20 | 39.75/31.60             | 14.59 $\pm$ 1.939 |
|                    | 2016 | 20 | 52.00/50.40             | 22.05 $\pm$ 3.374 |

**Table S2 community properties in the permanent plots (2 m × 2 m) of the grazed and ungrazed area at the early and intermediate successional stage in 2016.** Shown are the means ± 1 se of 8 permanent plots for total cover, number of species, species with cover ≥10 % (*Elytrigia atherica* is shown even its cover <10%) in the grazed and ungrazed treatments.

| Successional stage | Grazing  | Community properties          | Cover (%) / number of species |
|--------------------|----------|-------------------------------|-------------------------------|
| Early              | Grazed   | Total coverage                | 104.81 ± 1.55                 |
|                    |          | Species richness              | 6.25 ± 0.31                   |
|                    |          | <i>Artemisia maritima</i>     | 56.25 ± 4.2                   |
|                    |          | <i>Festuca rubra</i>          | 40 ± 1.89                     |
|                    |          | <i>Elytrigia atherica</i>     | 2.81 ± 1.85                   |
|                    | Ungrazed | Total coverage                | 102.69 ± 1.23                 |
|                    |          | Species richness              | 2.75 ± 0.25                   |
|                    |          | <i>Elytrigia atherica</i>     | 99.75 ± 0.25                  |
| Intermediate       | Grazed   | Total coverage                | 106.31 ± 4.77                 |
|                    |          | Species richness              | 7.5 ± 1.16                    |
|                    |          | <i>Artemisia maritima</i>     | 27 ± 10.85                    |
|                    |          | <i>Elytrigia atherica</i>     | 14.25 ± 5.8                   |
|                    |          | <i>Festuca rubra</i>          | 11.88 ± 5.42                  |
|                    |          | <i>Aster tripolium</i>        | 11.25 ± 4.41                  |
|                    | Ungrazed | Total coverage                | 99.5 ± 2.8                    |
|                    |          | Species richness              | 6.5 ± 1.02                    |
|                    |          | <i>Elytrigia atherica</i>     | 61.56 ± 13                    |
|                    |          | <i>Atriplex portulacoides</i> | 21.5 ± 8.97                   |

105 **Table S3 Model summary for the treatment effects on trait means and variations at the**  
106 **early and intermediate successional stages.**

| Variables                   | Successional stage | Terms     | D f | Sum Sq  | Mean Sq | F value | Pr(>F) |
|-----------------------------|--------------------|-----------|-----|---------|---------|---------|--------|
| height_avg                  | Early              | grazing   | 1   | 1372.43 | 1372.43 | 18.76   | 0      |
|                             | Early              | Residuals | 12  | 877.68  | 73.14   | #N/A    | #N/A   |
|                             | Intermediate       | grazing   | 1   | 400.85  | 400.85  | 27.18   | 0      |
|                             | Intermediate       | Residuals | 12  | 176.99  | 14.75   | #N/A    | #N/A   |
| aboveground.biomass_avg     | Early              | grazing   | 1   | 0.51    | 0.51    | 55.95   | 0      |
|                             | Early              | Residuals | 12  | 0.11    | 0.01    | #N/A    | #N/A   |
|                             | Intermediate       | grazing   | 1   | 0.27    | 0.27    | 29.4    | 0      |
|                             | Intermediate       | Residuals | 12  | 0.11    | 0.01    | #N/A    | #N/A   |
| flower_avg                  | Early              | grazing   | 1   | 0.28    | 0.28    | 18.83   | 0      |
|                             | Early              | Residuals | 12  | 0.18    | 0.01    | #N/A    | #N/A   |
|                             | Intermediate       | grazing   | 1   | 0.18    | 0.18    | 4.76    | 0.05   |
|                             | Intermediate       | Residuals | 12  | 0.46    | 0.04    | #N/A    | #N/A   |
| specific.leaf.area_avg      | Early              | grazing   | 1   | 33.37   | 33.37   | 0.26    | 0.62   |
|                             | Early              | Residuals | 12  | 1545.49 | 128.79  | #N/A    | #N/A   |
|                             | Intermediate       | grazing   | 1   | 833.35  | 833.35  | 5.49    | 0.04   |
|                             | Intermediate       | Residuals | 12  | 1820.59 | 151.72  | #N/A    | #N/A   |
| leaf.dry.matter.content_avg | Early              | grazing   | 1   | 0.01    | 0.01    | 0.4     | 0.55   |
|                             | Early              | Residuals | 6   | 0.22    | 0.04    | #N/A    | #N/A   |
|                             | Intermediate       | grazing   | 1   | 0       | 0       | 0.26    | 0.63   |
|                             | Intermediate       | Residuals | 6   | 0.02    | 0       | #N/A    | #N/A   |
| height_cv                   | Early              | grazing   | 1   | 0.02    | 0.02    | 3.89    | 0.07   |
|                             | Early              | Residuals | 12  | 0.07    | 0.01    | #N/A    | #N/A   |
|                             | Intermediate       | grazing   | 1   | 0       | 0       | 3.05    | 0.11   |

|                                |              |           |               |       |      |       |      |
|--------------------------------|--------------|-----------|---------------|-------|------|-------|------|
| aboveground.biomass_<br>cv     | Intermediate | Residuals | $\frac{1}{2}$ | 0.01  | 0    | #N/A  | #N/A |
|                                | Early        | grazing   | 1             | 0.01  | 0.01 | 0.62  | 0.45 |
|                                | Early        | Residuals | $\frac{1}{2}$ | 0.2   | 0.02 | #N/A  | #N/A |
|                                | Intermediate | grazing   | 1             | 0.01  | 0.01 | 1.24  | 0.29 |
| flower_cv                      | Intermediate | Residuals | $\frac{1}{2}$ | 0.05  | 0    | #N/A  | #N/A |
|                                | Early        | grazing   | 1             | 8.21  | 8.21 | 13.42 | 0    |
|                                | Early        | Residuals | $\frac{1}{2}$ | 7.34  | 0.61 | #N/A  | #N/A |
|                                | Intermediate | grazing   | 1             | 1.84  | 1.84 | 1.56  | 0.23 |
| specific.leaf.area_cv          | Intermediate | Residuals | $\frac{1}{2}$ | 14.15 | 1.18 | #N/A  | #N/A |
|                                | Early        | grazing   | 1             | 0     | 0    | 0.98  | 0.34 |
|                                | Early        | Residuals | $\frac{1}{2}$ | 0.04  | 0    | #N/A  | #N/A |
|                                | Intermediate | grazing   | 1             | 0     | 0    | 0.19  | 0.67 |
| leaf.dry.matter.content_<br>cv | Intermediate | Residuals | $\frac{1}{2}$ | 0.09  | 0.01 | #N/A  | #N/A |
|                                | Early        | grazing   | 1             | 0.07  | 0.07 | 0.16  | 0.71 |
|                                | Early        | Residuals | 6             | 2.83  | 0.47 | #N/A  | #N/A |
|                                | Intermediate | grazing   | 1             | 0.15  | 0.15 | 1.06  | 0.34 |
|                                | Intermediate | Residuals | 6             | 0.83  | 0.14 | #N/A  | #N/A |

107  
108
